# Supplementary material for: Senescence drives immunotherapy resistance by inducing an immunosuppressive tumor microenvironment
Source: Springer Nature journal article supplement (doi:10.1038/s41467-024-46769-9), 2024-03-18
Supplement: 41467_2024_46769_MOESM3_ESM.pdf [file 41467_2024_46769_MOESM3_ESM.pdf]

## **Description of Additional Supplementary Files**

**Supplementary Data 1:** complete list of DEGs defining clusters.

**Supplementary Data 2:** complete list of DEGs identified after using FindMarkers function between Ctrl, TBI and ABT group in the different clusters.

**Supplementary Data 3:** Antibodies used for flow cytometry.
